# Supplementary material for: Antibiotic Resistance of E. coli Isolated From a Constructed Wetland Dominated by a Crow Roost, With Emphasis on ESBL and AmpC Containing E. coli
Source: PubMed Central journal article supplement (PMC6530415; doi:10.3389/fmicb.2019.01034), 2019-05-15
Supplement: Image_1.pdf [file Image_1.pdf]

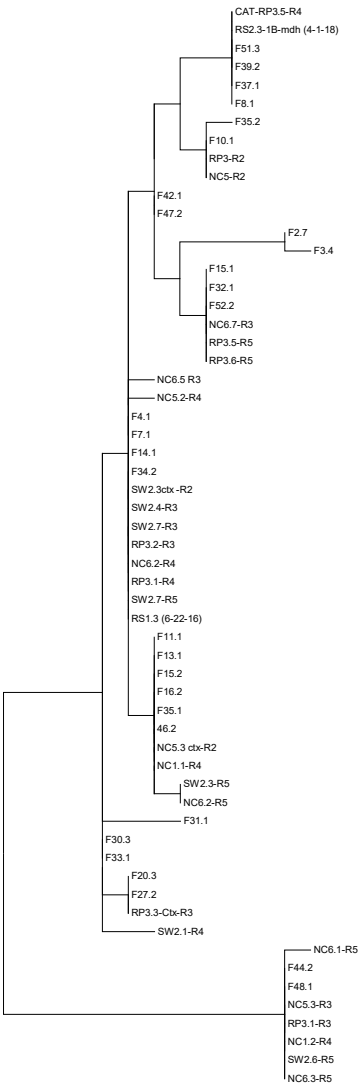

0.0050
